# Supplementary material for: Milk-derived exosomes (MDEs) have a different biological effect on normal fetal colon epithelial cells compared to colon tumor cells in a miRNA-dependent manner
Source: Springer Nature journal article supplement (doi:10.1186/s12967-019-2072-3), 2019-09-29
Supplement: MOESM2 [file 17220602]

**CONTROL 10% FCS**

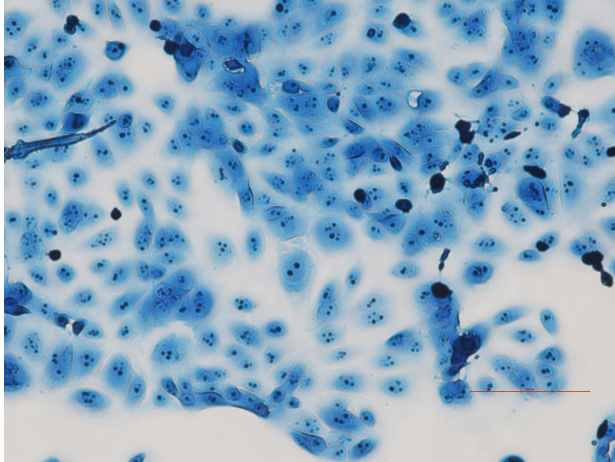

**CONTROL 0% FCS**

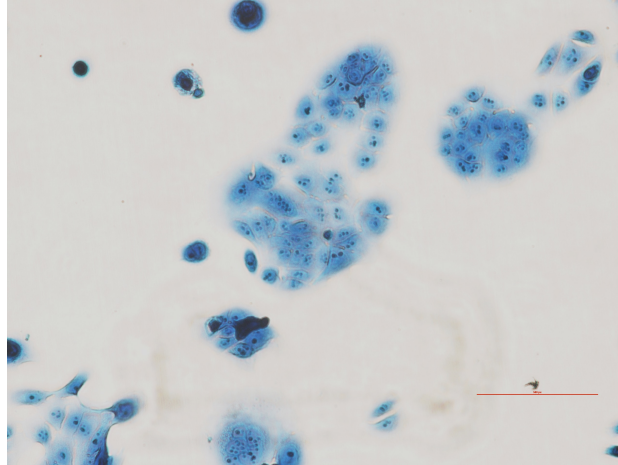

**EXOSOMES 0% FCS**

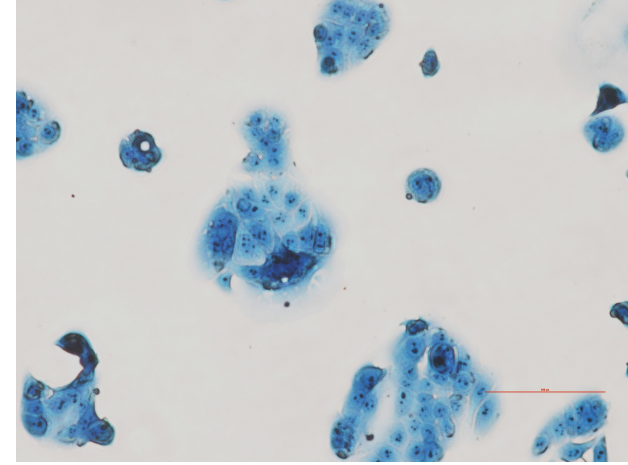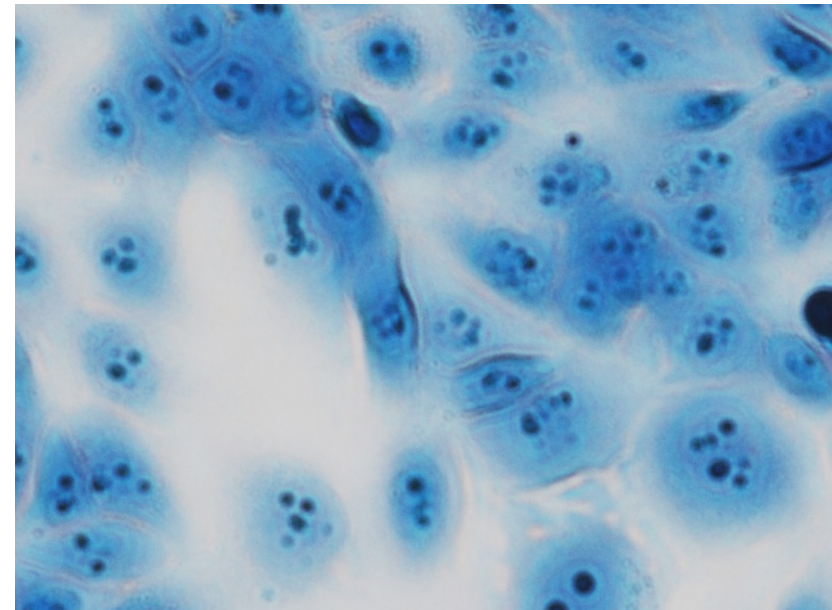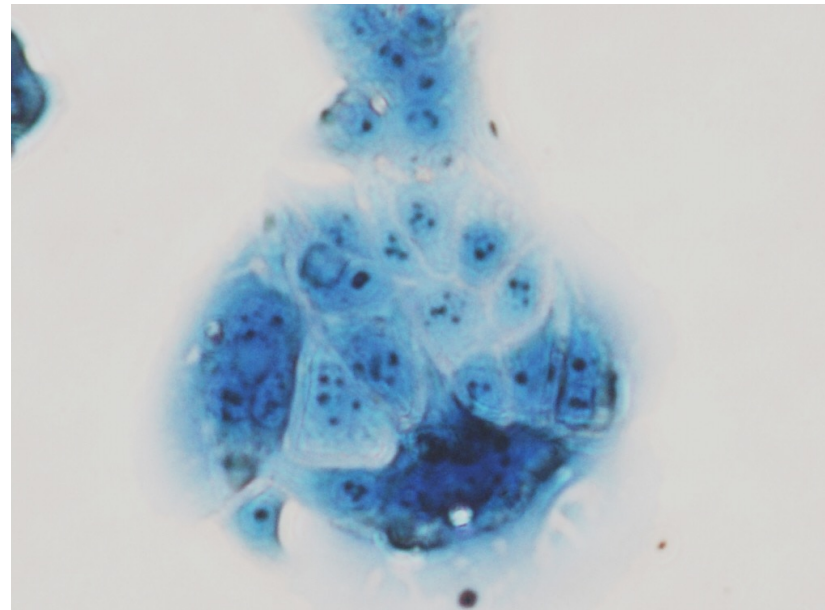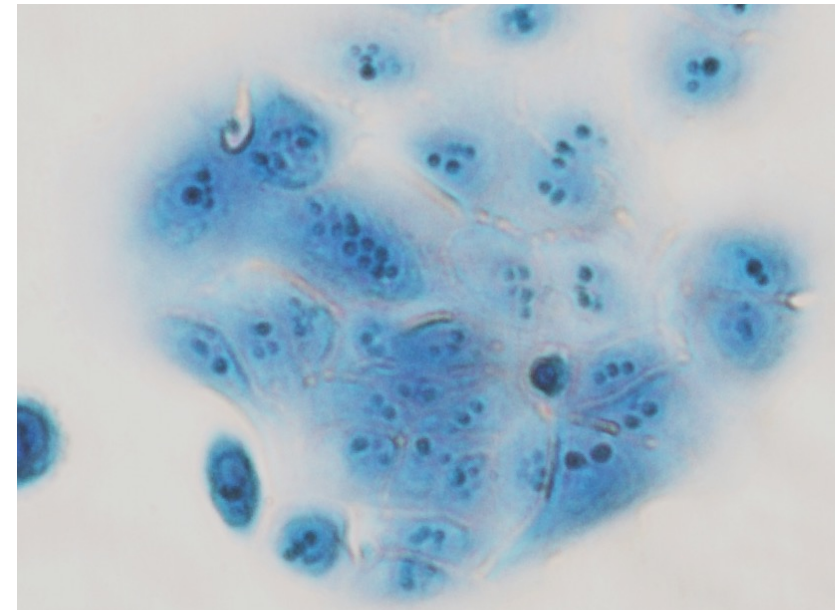

**Figure S2. Morphology of colonic tumor cells incubated with MDEs .** MDEs were grown in 10% or 0% FCS and incubated with colonic tumor cells (LS123). Light microscope pictures of selected fields of LS123 cells incubated with MDEs (EXOSOMES) or without (CONTROL) following methylene blue staining.
